# Supplementary material for: Suppression of isotopic polymorphism
Source: Royal Society of Chemistry journal article supplement (doi:10.1039/d0ce01636e), 2020-12-21
Supplement: d0ce01636e3.csv [file d0ce01636e3.csv]

DMOL-calculated frequencies for methylpyridine pentachlorophenol
All vibrational modes are given in inverse centimetres (cm^-1)
Optimised cell dimensions					Fixed (experimentally-observed) cell dimensions
TH	TD	MH	MD		TH	TD	MH	MD
26.2	26.19	17.2	17.14		36	36.01	26.8	26.78
34.2	34.19	20.2	20.16		43.3	43.25	30.7	30.64
35	34.93	24.4	24.4		46.6	46.51	40.1	40.04
37.9	37.89	28.7	28.71		49.5	49.45	42.9	42.76
44.2	44.11	32.1	32.12		54.8	54.75	43.5	43.41
44.2	44.14	34.4	34.33		57.9	57.81	46.9	46.83
53.4	53.33	39.8	39.78		66.2	66.13	48.5	48.49
57.3	57.25	41.6	41.51		66.5	66.46	51.9	51.8
57.4	57.39	43	42.94		70	69.92	57	56.94
63.2	63.23	47.7	47.67		72.1	72.04	64.5	64.5
67.4	67.37	50.3	50.3		87	86.88	67.9	67.81
72	72.01	54	53.95		87.4	87.41	69.1	69.08
81.2	81.07	56	55.92		90.9	90.88	76.1	76.02
82.9	82.79	70.1	70.04		94.4	94.19	88.1	88.06
84.7	84.62	80.6	80.58		99	98.99	89.6	89.5
89.5	89.39	82.3	82.3		100.4	100.39	93.2	93.18
92.7	92.56	84	83.96		106.5	106.35	98.9	98.9
100.3	99.61	86.9	86.81		108.3	107.83	100.8	100.76
105.4	104.99	88.9	88.83		114.2	114.02	103.4	103.4
107.5	107.4	92.4	92.39		114.7	114.32	106.5	106.49
111.5	111.28	94.3	94.22		116.9	116.4	112	111.84
111.9	111.42	99.2	99.07		120	119.37	114.7	114.55
116.3	116.13	106	105.85		123.6	123.19	116.1	115.99
117	116.27	107.9	107.67		129	128.66	123.7	123.56
127.9	127.31	108.4	108.23		132.2	131.76	131.9	131.3
161.6	161.35	110.5	110.38		136.8	136.7	132.6	132.14
167.9	167.65	134	133.53		138.3	138.26	143.9	143.7
206.6	206.59	137.4	136.84		169.8	169.56	145.8	145.54
207.2	207.14	161.9	161.8		170.4	170.22	192.2	192.04
208.1	208.13	185	184.77		205.1	205.05	193.8	193.56
208.4	208.44	192.6	192.34		205.2	205.17	205.8	205.68
211.8	211.78	204.7	204.61		208.8	208.74	207.1	206.97
211.8	211.81	206.7	206.61		209.1	209.08	210	209.99
217.4	217.22	207.2	207.05		216.4	216.34	213.7	213.66
219.9	219.72	210.4	210.33		216.5	216.47	215.7	215.6
222	221.99	211.8	211.61		222.1	222.01	216.5	216.45
222.9	222.83	216.5	216.37		223.3	223.28	222.5	222.52
236.4	234.84	219.6	219.57		223.9	223.75	225.5	225.47
242.1	242.01	223.3	223.27		224.2	224.24	230.5	230.35
246.2	244.43	234.2	233.54		239.2	235.81	250.6	249.62
249.3	246.51	246	245.21		243.8	241.07	262.3	261.62
301.9	301.91	309.1	308.53		309	308.98	311.6	310.95
302.4	302.36	310.7	310.1		309.5	309.49	311.7	311.08
324.1	324.11	330	329.72		330.8	330.83	332.6	332.22
324.3	324.26	330.5	330.17		332.1	332.12	333.7	333.09
329.7	329.71	331.1	330.82		333.5	333.46	334.6	334.56
330.2	330.16	338	336.73		335.2	335.19	337.9	337.87
336.2	336.15	344.1	342.28		342.3	342.25	348.2	346.85
339.9	339.87	344.7	344.51		343.1	343.07	353.2	348.74
353.4	352.63	347	346.41		350.3	349.66	360.1	355.12
353.4	352.75	358.3	356.75		350.4	349.69	363	362.09
364.3	364.23	364.2	357.69		368.4	368.3	370.8	369.13
365.1	365.11	367.7	363.99		369.7	369.66	373.1	371.33
377.1	376.83	368.3	368		379	378.82	374.1	373.04
379.7	379.45	370.2	369.51		381.8	381.55	375	374.37
408.2	408.22	390.4	390.34		406.9	406.91	392.1	392.1
413.7	413.7	390.6	390.56		413.8	413.79	396.9	396.83
469.2	468.77	454.6	448.58		471.5	471.01	455.5	449.72
469.3	468.82	459.8	453.72		472.2	471.67	459.8	453.9
489.9	487.86	482.2	480.54		486.8	484.64	484.6	482.86
491.9	489.52	496.9	494.68		489	486.38	501.4	499.29
514.2	502.61	529.4	529.07		519.9	509.43	533.8	533.42
516.4	504.91	532	531.69		521.9	511.47	535.1	534.68
560.8	560.77	569.6	569.63		572.1	572.13	569.9	569.91
561.7	561.7	594	594		573.8	573.78	584.8	584.68
624	623.97	619.6	615.24		631.2	631.06	609.9	607.67
624.6	624.52	633.7	631.55		632.7	632.55	632.6	629.38
635.1	635	641.3	639.15		641.7	641.69	642.2	640.63
636.4	636.34	647.2	645.51		642.6	642.48	646	644.02
652.8	651.81	660.9	647.87		654	652.9	662.8	656.9
654	652.84	667.7	660.12		655.3	654.04	670.3	664.52
698.4	698.07	702.7	667.96		702.5	702.21	698.2	665.76
699.4	699.06	707.5	669.11		703.5	703.29	706.5	671.11
717.7	714.91	710.7	695.98		714.3	710.84	712.1	699.98
718.9	715.09	721.8	698.63		714.5	711.67	722.9	702.72
726.6	725.85	729.8	712.66		723.2	722.66	723.3	704.67
727.1	726.48	733.1	724.42		723.8	723.25	734.1	725.44
739.4	739.2	745	734.13		745.1	744.93	747.9	727.26
741.4	741.17	751.2	737.42		746.7	746.19	753.7	737.63
794	779.19	795.4	742.51		801.4	781.38	788.5	745.74
796.8	782.36	800.5	748.37		803.7	782.02	799.9	751.73
805.7	782.9	803.2	799.76		812.7	790.06	813	794.14
807.9	785.44	811.8	803.16		814.6	794.16	815.7	806.28
832.9	832.89	852.7	807.42		843.1	843.09	856	813.4
833	832.91	860.1	812.77		844	843.53	860.7	816.15
861.9	861.57	872.3	851.16		871.8	861.32	863.6	854.53
864.3	864.11	874.1	858.64		871.9	863.44	867.5	859.31
956.7	869.35	908.5	872.98		966.3	874.29	925	863.69
957.5	871.95	936.4	874		968.3	874.53	933.6	867.29
960.6	929.63	953.9	931.95		968.9	943.43	952.3	939.46
966.3	934.94	959.6	938.58		975.4	947.56	959.4	940.25
971.8	962.67	970.3	952.14		979.5	969.95	971.9	948.22
971.9	967.25	972.6	955.37		980.3	975.27	975.8	957.15
980.6	969.39	974.8	972.69		990.5	977.34	981.5	977.05
981.8	970.13	983.6	973.45		992.6	977.75	991.3	980.41
997.1	983.87	988.3	981.96		994.2	987.33	994.7	987.33
997.9	984.21	1000.5	985.39		994.3	987.79	1001.7	993.01
1046.6	991.79	1004.9	991.46		1033.2	995.9	1014.7	994.19
1048.2	993.13	1013.6	1001.59		1035	996.68	1020.2	1001.51
1049.9	1042.55	1023	1004.49		1049.7	1033.56	1031	1017
1052.9	1044	1046.5	1013.77		1050.4	1035.08	1052.4	1020.71
1077.3	1049.45	1062.9	1023.14		1090.2	1044.39	1065.9	1031.1
1077.3	1051.41	1068.4	1046.71		1090.4	1044.61	1066.5	1052.46
1109.4	1073.23	1099.5	1065.48		1109	1072.97	1098.8	1066.36
1110.2	1073.95	1100.8	1069.76		1110	1073.47	1105.1	1067.22
1173.9	1078.07	1103.9	1099.82		1154.5	1090.5	1108.7	1101.87
1174.9	1078.37	1113.1	1104.08		1154.5	1090.82	1111.6	1108.45
1197.2	1157.65	1197.6	1106.16		1196	1157.69	1201.6	1108.92
1197.6	1161.96	1205.5	1114.48		1196	1161.2	1206.5	1118.01
1223.7	1195.82	1222.5	1201.99		1231.3	1195.34	1223.2	1206.48
1225.1	1196.64	1225.7	1214.39		1233.3	1195.45	1231.2	1208.8
1240.4	1224.45	1232.5	1224.69		1244.1	1232.2	1233	1231.5
1243.1	1225.9	1241.9	1226.51		1246	1234.52	1243.1	1231.77
1249.8	1239.08	1246.3	1245.28		1265.7	1244.01	1256.6	1233.45
1250	1242.51	1260.9	1253.59		1266.5	1247.02	1257.4	1253.78
1310	1249.93	1294.8	1269.37		1314.2	1265.54	1294.9	1281.15
1310	1249.96	1294.9	1293.76		1314.7	1266.38	1303	1282.12
1323.4	1320.68	1313.7	1297.54		1327.3	1324.34	1322.7	1304.68
1324	1322.82	1318	1313.11		1332.3	1326.98	1322.8	1318.59
1326.2	1323.06	1326.4	1315.69		1334.5	1333.94	1323	1322.7
1330.8	1324.39	1333.5	1326.23		1334.9	1334.45	1325	1322.78
1383.1	1348.7	1340.4	1326.38		1381	1356.51	1346.5	1328.77
1389.5	1352.41	1363.2	1361.3		1381.3	1357.04	1351.4	1339.64
1392.3	1352.89	1363.8	1363.2		1407.9	1377.02	1378.2	1378.03
1398.8	1364.18	1378.8	1378.61		1413.2	1379.15	1381.5	1381.28
1415.1	1392.12	1410.8	1407.02		1416.2	1383.35	1409.9	1408.21
1419.8	1392.53	1416.4	1410.09		1426.5	1394.99	1423.4	1410.21
1441.5	1438.13	1418.4	1417.55		1427.4	1425.98	1424.1	1415.18
1441.8	1438.45	1422	1418.21		1428.6	1426.49	1427.8	1424
1446.3	1443.89	1428.3	1419.93		1443.6	1439.53	1429.9	1426.22
1447.7	1444.43	1434.2	1427.26		1444.3	1440.59	1434.9	1433.94
1459.6	1455.66	1455.5	1454.59		1464	1461.49	1458.9	1458.29
1460	1455.9	1457.5	1457.27		1464.7	1463.21	1462	1461.46
1480.4	1461.35	1483.9	1480.17		1497.2	1468.92	1470.6	1468.78
1486.1	1463.37	1486.1	1483.47		1502.8	1470.35	1494.6	1490.78
1508.5	1474.14	1500.8	1496.43		1514.6	1479.94	1496.5	1493.99
1509.3	1474.39	1507	1504.79		1516.2	1483.42	1502.1	1495.41
1542.9	1505.77	1528.9	1522.46		1546.7	1514.7	1529.7	1523.29
1543.3	1508.23	1548.2	1546.96		1547	1517.12	1543	1534.64
1634.8	1567	1559.8	1554.29		1639.2	1570.46	1561.5	1560.29
1637.9	1567.71	1574.1	1573.44		1642.1	1571.17	1576.5	1575.2
1684.9	1586.94	1613.6	1613.14		1683.6	1606.94	1610.8	1610.16
1686.7	1588.18	1619.7	1619.35		1685.8	1609.7	1630.4	1629.91
1979	1660.37	2627.1	1932.55		2057	1679.51	2507.5	1849.32
1987.1	1662	2640.7	1941.79		2064.9	1680.71	2511.9	1851.94
3023.2	3023.11	2979.5	2979.35		2999.8	2999.59	2987.3	2987.21
3023.3	3023.15	3017.5	3017.36		2999.9	2999.81	3036.7	3036.58
3092	3091.92	3036.1	3035.94		3063.6	3063.47	3064.5	3064.43
3092.1	3091.93	3090.6	3090.44		3063.7	3063.56	3110.8	3110.69
3121.2	3121.05	3110.1	3109.97		3122.1	3121.94	3125.3	3125.23
3121.2	3121.11	3111	3110.92		3122.1	3121.96	3136.4	3136.33
3132.7	3132.45	3118.1	3117.92		3158.6	3158.34	3141.5	3141.33
3132.9	3132.67	3131.3	3131.14		3158.8	3158.56	3142.9	3142.81
3138.4	3138.31	3155.6	3155.46		3171.5	3171.34	3147.4	3147.13
3138.8	3138.68	3160.6	3160.48		3172.6	3172.43	3152.5	3152.34
3156.6	3156.46	3163.6	3163.37		3174.4	3174.23	3169.2	3169
3156.6	3156.49	3174.6	3174.42		3174.4	3174.29	3176.5	3176.3
3215.1	3214.91	3184.8	3184.55		3212.4	3212.23	3182.4	3182.27
3215.2	3215.06	3194.4	3194.3		3212.6	3212.45	3189.9	3189.76
